# Supplementary material
Source: PubMed Central journal article supplement (PMC10887428)
Supplement: NIHMS1901642-supplement-Supplement.pdf [file NIHMS1901642-supplement-Supplement.pdf]

## Supplementary Online Content

Dantes R, Mu Y, Belflower R, et al; Emerging Infections Program–Active Bacterial Core Surveillance MRSA Surveillance Investigators. National burden of invasive methicillin-resistant *Staphylococcus aureus* infections, United States, 2011. *JAMA Intern Med*. Published online September 16, 2013.  
doi:10.1001/jamainternmed.2013.10423

**eTable.** Lower Respiratory Invasive Methicillin-Resistant *Staphylococcus aureus* (MRSA) Infections Among Health Care–Associated Community-Onset (HACO), Hospital-Onset (HO), and Community-Associated (CA) Cases Reported to Emerging Infections Program–Active Bacterial Core Surveillance, United States, 2011

This supplementary material has been provided by the authors to give readers additional information about their work.

**eTable:** Lower Respiratory Invasive Methicillin-Resistant *Staphylococcus aureus* (MRSA) Infections Among Health Care–Associated Community-Onset (HACO), Hospital-Onset (HO), and Community-Associated (CA) Cases Reported to Emerging Infections Program–Active Bacterial Core Surveillance, United States, 2011

| Characteristic                                                                           | HACO |       | HO  |       | CA  |       | Total <sup>a</sup> |       | P-value <sup>b</sup> |
|------------------------------------------------------------------------------------------|------|-------|-----|-------|-----|-------|--------------------|-------|----------------------|
| Pneumonia diagnosis in discharge summary                                                 | 441  | (100) | 146 | (100) | 154 | (100) | 760                | (100) | 0.466                |
| Chest Radiology Imaging                                                                  | 431  | (98)  | 141 | (97)  | 150 | (97)  | 722                | (95)  |                      |
| Radiograph                                                                               | 334  | (90)  | 106 | (66)  | 103 | (69)  | 556                | (76)  | 0.020                |
| Computerized Tomography                                                                  | 87   | (23)  | 35  | (22)  | 47  | (31)  | 173                | (24)  | 0.021                |
| Radiology Results (multiple results possible)                                            |      |       |     |       |     |       |                    |       |                      |
| Confirmatory of Lower Respiratory Infection                                              |      |       |     |       |     |       |                    |       |                      |
| Air space density/opacity                                                                | 178  | (42)  | 60  | (43)  | 64  | (41)  | 305                | (42)  | 0.925                |
| New or changed infiltrates                                                               | 171  | (41)  | 49  | (35)  | 50  | (32)  | 278                | (38)  | 0.355                |
| Bronchopneumonia                                                                         | 110  | (26)  | 29  | (21)  | 46  | (29)  | 190                | (26)  | 0.099                |
| Other Radiographic Findings                                                              |      |       |     |       |     |       |                    |       |                      |
| Pleural effusion                                                                         | 172  | (41)  | 60  | (43)  | 59  | (38)  | 294                | (40)  | 0.941                |
| Consolidation                                                                            | 82   | (19)  | 37  | (26)  | 34  | (22)  | 157                | (22)  | 0.191                |
| Cannot rule out pneumonia                                                                | 21   | (5)   | 4   | (3)   | 10  | (6)   | 36                 | (5)   | 0.277                |
| Cavitation                                                                               | 8    | (2)   | 2   | (1)   | 8   | (5)   | 18                 | (2)   | 0.070                |
| No Evidence of Pneumonia                                                                 | 7    | (2)   | 1   | (1)   | 1   | (1)   | 9                  | (1)   | 0.715                |
| None Listed                                                                              | 8    | (2)   | 6   | (4)   | 5   | (3)   | 19                 | (3)   | 0.226                |
| Other                                                                                    | 33   | (8)   | 9   | (6)   | 16  | (10)  | 60                 | (8)   | 0.373                |
| MRSA positive non-sterile respiratory specimens                                          | 155  | (35)  | 75  | (51)  | 60  | (39)  | 295                | (39)  | 0.002                |
| Confirmed Lower Respiratory Infection                                                    | 127  | (29)  | 58  | (40)  | 51  | (33)  | 239                | (31)  | 0.020                |
| <sup>a</sup> 19 additional cases with unknown epidemiological category included in total |      |       |     |       |     |       |                    |       |                      |
| <sup>b</sup> $\chi^2$ test comparing all epidemiologic categories                        |      |       |     |       |     |       |                    |       |                      |
